# Supplementary material for: Polygenic Risk Score Prediction for Endometriosis
Source: Front Reprod Health. 2021 Dec 17;3:793226. doi: 10.3389/frph.2021.793226 (PMC9580817; doi:10.3389/frph.2021.793226)
Supplement: Supplementary Table 1 — Single SNP association for the 14 SNPs with endometriosis (N80.1-80.9) in Danish clinical and DTR cohorts, within the UK Biobank, and from the Sapkota et al. (9) GWAS. [file Table_1.xlsx]

## Sheet: Sheet1
						Clinical cohort					DTR biobank					UK Biobank				Sapkota et al. (2017)
						Cases	Controls				Cases	Controls
						n=249	n=348				n=140	n=316
	SNP	Locus	EA	OA		Freq (EA)	Freq (EA)	OR (EA)	P-value		Freq (EA)	Freq (EA)	OR (EA)	P-value		Freq (EA)	OR (EA)	P-value		Freq (EA)	OR (EA)	P-value
	rs10167914	IL1A	G	A		0.32	0.33	0.94	0.64		0.36	0.3	1.32	0.07		0.3	1.05	0.1		0.3	1.12	1.10·10-9
	rs11674184	GREB1	T	G		0.67	0.64	1.13	0.33		0.69	0.67	1.11	0.48		0.62	1.09	0.002		0.62	1.13	2.67·10-17
	rs12037376	WNT4	A	G		0.21	0.19	1.16	0.29		0.19	0.17	1.19	0.36		0.16	1.08	0.05		0.17	1.16	8.87·10-17
	rs1250241	FN1	T	A		0.28	0.21	1.45	0.008		0.26	0.27	0.96	0.82		0.27	1.03	0.33		0.29	1.06	6.20·10-5
	rs12700667	7p15.2	A	G		0.81	0.75	1.37	0.03		0.78	0.74	1.28	0.14		0.74	1.06	0.07		0.74	1.1	9.08·10-10
	rs1537377	CDKN2B-AS1	C	T		0.45	0.39	1.31	0.02		0.42	0.4	1.09	0.53		0.4	1.08	0.009		0.4	1.09	1.33·10-10
	rs1903068	KDR	A	G		0.73	0.7	1.16	0.25		0.72	0.65	1.39	0.04		0.68	1.03	0.26		0.68	1.11	1.04·10-11
	rs1971256	CCDC170	C	T		0.26	0.19	1.56	0.002		0.19	0.17	1.17	0.41		0.2	1.09	0.02		0.2	1.09	3.74·10-8
	rs4762326	VEZT	T	C		0.47	0.45	1.07	0.56		0.48	0.42	1.32	0.07		0.53	1.04	0.18		0.47	1.08	2.20·10-9
	rs6546324	2p14	A	C		0.35	0.31	1.19	0.19		0.31	0.28	1.13	0.42		0.3	1	0.93		0.31	1.08	3.01·10-8
	rs71575922	SYNE1	G	C		0.23	0.24	1.48	0.008		0.2	0.17	1.24	0.25		0.15	1.19	4.3·10-6		0.16	1.11	2.02·10-8
	rs74485684	FSHB	T	C		0.86	0.82	1.32	0.09		0.85	0.82	1.18	0.4		0.84	1.17	8.8·10-5		0.84	1.11	2.00·10-8
	rs74491657	7p12.3	G	A		0.9	0.91	0.94	0.75		0.93	0.88	1.89	0.02		0.92	1.08	0.13		0.91	1.08	1.23·10-3
	rs77294520*	GREB1	C	G		0.18	0.13	1.55	0.009		0.17	0.15	1.16	0.45		0.15	1.17	4.2·10-5		0.15	1.16	9.91·10-13
	*region-wide associated after conditioning on the index SNP rs11674184 (Sapkota et al., 2017).
